# Supplementary material
Source: PubMed Central journal article supplement (PMC8964503)
Supplement: mmc1.pdf [file mmc1.pdf]

# THE LANCET

## Respiratory Medicine

### Supplementary appendix

This appendix formed part of the original submission and has been peer reviewed. We post it as supplied by the authors.

Supplement to: Chadeau-Hyam M, Wang H, Eales O, et al. SARS-CoV-2 infection and vaccine effectiveness in England (REACT-1): a series of cross-sectional random community surveys. *Lancet Respir Med* 2022; published online Jan 24. [https://doi.org/S2213-2600\(21\)00542-7](https://doi.org/S2213-2600(21)00542-7).

**Supplementary Information:**

**SARS-CoV-2 infection and vaccine effectiveness in England (REACT-1): a series of cross-sectional random community surveys**

\*Corresponding authors: Paul Elliott and Christl A Donnelly, [p.elliott@imperial.ac.uk](mailto:p.elliott@imperial.ac.uk), [c.donnelly@imperial.ac.uk](mailto:c.donnelly@imperial.ac.uk) School of Public Health, Imperial College London, Norfolk Place, London, W2 1PG

**Supplementary Table 1.** Comparison of the characteristics of participants in round 13 and round 14 of REACT-1 study consenting to their data being linked to their NHS record and those who did not. Comparing proportions within each category using a chi-squared test yielded p-values <0.001 for all categories. We also report odds ratios from logistic models for linkage status (as binary outcome), all statistically significant with p-value<0.001.

|                    |                                                    | Full population |         | Not linked |        | Linked  |         | OR                |
|--------------------|----------------------------------------------------|-----------------|---------|------------|--------|---------|---------|-------------------|
| Gender             | Male                                               | 87,821          | 44.18%  | 11,051     | 42.67% | 76,770  | 44.41%  | Ref               |
|                    | Female                                             | 110,933         | 55.81%  | 14,846     | 57.32% | 96,087  | 55.59%  | 0.93 (0.91, 0.96) |
|                    | Unknown                                            | 6               | 0.00%   | 1          | 0.00%  | 5       | 0.00%   | 0.72 (0.08, 6.16) |
| Age                | 35-44                                              | 23,994          | 12.07%  | 3,480      | 13.44% | 20,514  | 11.87%  | Ref               |
|                    | 05-12                                              | 13,452          | 6.77%   | 2,113      | 8.16%  | 11,339  | 6.56%   | 0.91 (0.86, 0.97) |
|                    | 13-17                                              | 10,350          | 5.21%   | 2,364      | 9.13%  | 7,986   | 4.62%   | 0.57 (0.54, 0.61) |
|                    | 18-24                                              | 5,569           | 2.80%   | 844        | 3.26%  | 4,725   | 2.73%   | 0.95 (0.88, 1.03) |
|                    | 25-34                                              | 15,262          | 7.68%   | 2,429      | 9.38%  | 12,833  | 7.42%   | 0.90 (0.85, 0.95) |
|                    | 45-54                                              | 32,631          | 16.42%  | 3,997      | 15.43% | 28,634  | 16.56%  | 1.22 (1.16, 1.28) |
|                    | 55-64                                              | 39,656          | 19.95%  | 4,220      | 16.29% | 35,436  | 20.50%  | 1.42 (1.36, 1.49) |
|                    | 65-74                                              | 38,149          | 19.19%  | 4,121      | 15.91% | 34,028  | 19.69%  | 1.40 (1.33, 1.47) |
|                    | 75+                                                | 19,697          | 9.91%   | 2,330      | 9.00%  | 17,367  | 10.05%  | 1.26 (1.20, 1.34) |
| Region             | South East                                         | 34,815          | 17.52%  | 4,327      | 16.71% | 30,488  | 17.64%  | Ref               |
| Employment type    | North East                                         | 9,051           | 4.55%   | 1,076      | 4.15%  | 7,975   | 4.61%   | 1.05 (0.98, 1.13) |
|                    | North West                                         | 23,931          | 12.04%  | 3,145      | 12.14% | 20,786  | 12.02%  | 0.94 (0.89, 0.99) |
|                    | Yorkshire and The Humber                           | 19,437          | 9.78%   | 2,390      | 9.23%  | 17,047  | 9.86%   | 1.01 (0.96, 1.07) |
|                    | East Midlands                                      | 17,255          | 8.68%   | 2,025      | 7.82%  | 15,230  | 8.81%   | 1.07 (1.01, 1.13) |
|                    | West Midlands                                      | 20,091          | 10.11%  | 2,604      | 10.05% | 17,487  | 10.12%  | 0.95 (0.90, 1.00) |
|                    | East of England                                    | 22,966          | 11.55%  | 2,757      | 10.65% | 20,209  | 11.69%  | 1.04 (0.99, 1.09) |
|                    | London                                             | 29,483          | 14.83%  | 5,009      | 19.34% | 24,474  | 14.16%  | 0.69 (0.66, 0.72) |
|                    | South West                                         | 21,731          | 10.93%  | 2,565      | 9.90%  | 19,166  | 11.09%  | 1.06 (1.01, 1.12) |
|                    | Other worker                                       | 76,314          | 38.40%  | 10,230     | 39.50% | 66,084  | 38.23%  | Ref               |
|                    | Health care or care home worker                    | 15,378          | 7.74%   | 1,727      | 6.67%  | 13,651  | 7.90%   | 1.22 (1.16, 1.29) |
|                    | Other essential/key worker                         | 28,954          | 14.57%  | 3,239      | 12.51% | 25,715  | 14.88%  | 1.23 (1.18, 1.28) |
|                    | Not full-time, part-time, or self-employed         | 73,945          | 37.20%  | 9,569      | 36.95% | 64,376  | 37.24%  | 1.04 (1.01, 1.07) |
|                    | Unknown                                            | 4,169           | 2.10%   | 1,133      | 4.37%  | 3,036   | 1.76%   | 0.41 (0.39, 0.45) |
|                    | Ethnic group                                       | White           | 173,460 | 87.27%     | 20,623 | 79.63%  | 152,837 | 88.42%            |
| Asian              |                                                    | 11,322          | 5.70%   | 2,334      | 9.01%  | 8,988   | 5.20%   | 0.52 (0.50, 0.55) |
| Black              |                                                    | 3,983           | 2.00%   | 927        | 3.58%  | 3,056   | 1.77%   | 0.44 (0.41, 0.48) |
| Mixed              |                                                    | 3,577           | 1.80%   | 593        | 2.29%  | 2,984   | 1.73%   | 0.68 (0.62, 0.74) |
| Other              |                                                    | 2,078           | 1.05%   | 417        | 1.61%  | 1,661   | 0.96%   | 0.54 (0.48, 0.60) |
| Unknown            |                                                    | 4,340           | 2.18%   | 1,004      | 3.88%  | 3,336   | 1.93%   | 0.45 (0.42, 0.48) |
| Household size     | 1                                                  | 32,169          | 16.18%  | 4,077      | 15.74% | 28,092  | 16.25%  | Ref               |
|                    | 2                                                  | 76,331          | 38.40%  | 8,976      | 34.66% | 67,355  | 38.96%  | 1.09 (1.05, 1.13) |
|                    | 3                                                  | 34,437          | 17.33%  | 4,621      | 17.84% | 29,816  | 17.25%  | 0.94 (0.90, 0.98) |
|                    | 4                                                  | 38,482          | 19.36%  | 5,588      | 21.58% | 32,894  | 19.03%  | 0.85 (0.82, 0.89) |
|                    | 5                                                  | 12,344          | 6.21%   | 1,839      | 7.10%  | 10,505  | 6.08%   | 0.83 (0.78, 0.88) |
|                    | 6+                                                 | 4,997           | 2.51%   | 797        | 3.08%  | 4,200   | 2.43%   | 0.76 (0.70, 0.83) |
| COVID case contact | No                                                 | 159,401         | 80.20%  | 20,029     | 77.34% | 139,372 | 80.63%  | Ref               |
|                    | Yes, contact with a confirmed/tested COVID-19 case | 6,887           | 3.46%   | 836        | 3.23%  | 6,051   | 3.50%   | 1.04 (0.97, 1.12) |
|                    | Yes, contact with a suspected COVID-19 case        | 2,133           | 1.07%   | 250        | 0.97%  | 1,883   | 1.09%   | 1.08 (0.95, 1.24) |
|                    | Unknown                                            | 30,339          | 15.26%  | 4,783      | 18.47% | 25,556  | 14.78%  | 0.77 (0.74, 0.79) |
| Symptom status     | No symptoms                                        | 139,457         | 70.16%  | 17,615     | 68.02% | 121,842 | 70.49%  | Ref               |
|                    | Classic COVID symptoms                             | 7,899           | 3.97%   | 871        | 3.36%  | 7,028   | 4.07%   | 1.17 (1.09, 1.25) |
|                    | Other symptoms                                     | 21,196          | 10.66%  | 2,649      | 10.23% | 18,547  | 10.73%  | 1.01 (0.97, 1.06) |
|                    | Unknown                                            | 30,208          | 15.20%  | 4,763      | 18.39% | 25,445  | 14.72%  | 0.77 (0.75, 0.80) |

**Supplementary Table 2.** Unweighted and weighted prevalence of swab-positivity and median N-gene Ct values between individuals with different methods of swab test collection in round 14.

|         | Negatives | Positives | Total  | Unweighted prevalence | Weighted prevalence  | Median N-gene Ct value* | P-value** |
|---------|-----------|-----------|--------|-----------------------|----------------------|-------------------------|-----------|
| Post    | 53,428    | 394       | 53,822 | 0.73% (0.66%, 0.81%)  | 0.80% (0.72%, 0.90%) | 28.9 (27.9, 29.9)       | ref       |
| Courier | 46,335    | 370       | 46,705 | 0.79% (0.71%, 0.88%)  | 0.85% (0.76%, 0.96%) | 28.0 (27.0, 29.0)       | 0.06      |

\* 95% Confidence intervals in the median were estimated using quantile regression

\*\*P-values were calculated using the two-sided Wilcoxon test and are relative to the distribution of Ct values in individuals that sent their test via post

**Supplementary Table 3.** Unweighted and weighted prevalence of swab-positivity from REACT-1 across rounds 1 to 14

| Round | Tested swabs | Positive swabs | Unweighted prevalence (95% CI) | Weighted prevalence (95% CI) | First sample | Last sample |
|-------|--------------|----------------|--------------------------------|------------------------------|--------------|-------------|
| 1     | 120,620      | 159            | 0.13% (0.11%, 0.15%)           | 0.16% (0.13%, 0.19%)         | 01/05/20     | 01/06/20    |
| 2     | 159,199      | 123            | 0.08% (0.06%, 0.09%)           | 0.09% (0.07%, 0.11%)         | 19/06/20     | 07/07/20    |
| 3     | 162,821      | 54             | 0.03% (0.02%, 0.04%)           | 0.04% (0.03%, 0.05%)         | 24/07/20     | 11/08/20    |
| 4     | 154,325      | 137            | 0.09% (0.07%, 0.11%)           | 0.13% (0.10%, 0.15%)         | 20/08/20     | 08/09/20    |
| 5     | 174,949      | 824            | 0.47% (0.44%, 0.50%)           | 0.60% (0.55%, 0.71%)         | 18/09/20     | 05/10/20    |
| 6     | 160,175      | 1,732          | 1.08% (1.03%, 1.13%)           | 1.30% (1.21%, 1.39%)         | 16/10/20     | 02/11/20    |
| 7     | 168,181      | 1,299          | 0.77% (0.73%, 0.82%)           | 0.94% (0.87%, 1.01%)         | 13/11/20     | 03/12/20    |
| 8     | 167,642      | 2,282          | 1.36% (1.31%, 1.42%)           | 1.57% (1.49%, 1.66%)         | 06/01/21     | 22/01/21    |
| 9     | 165,456      | 689            | 0.42% (0.39%, 0.45%)           | 0.49% (0.44%, 0.55%)         | 04/02/21     | 23/02/21    |
| 10    | 140,844      | 227            | 0.16% (0.14%, 0.18%)           | 0.20% (0.17%, 0.23%)         | 11/03/21     | 30/03/21    |
| 11    | 127,408      | 115            | 0.09% (0.07%, 0.11%)           | 0.10% (0.08%, 0.13%)         | 15/04/21     | 03/05/21    |
| 12*   | 108,911      | 135            | 0.12% (0.10%, 0.15%)           | 0.15% (0.12%, 0.18%)         | 20/05/21     | 07/06/21    |
| 13    | 98,233       | 527            | 0.54% (0.49%, 0.58%)           | 0.63% (0.57%, 0.69%)         | 24/06/21     | 12/07/21    |
| 14**  | 100,527      | 764            | 0.76% (0.71%, 0.82%)           | 0.83% (0.76%, 0.89%)         | 09/09/21     | 27/09/21*** |

\* Sampling strategy changed for round 12 and subsequent rounds. Unweighted prevalence is not directly comparable with previous rounds

\*\* Sample handling changed in round 14. Prevalence is not directly comparable with previous rounds

\*\*\* 509 (including 9 positive) samples (<0.5%) were received 28-30 Sept 2021 and are included in round 14

**Supplementary Table 4.** Weighted prevalence of swab-positivity from participants aged 18 years and over by vaccination status and age group using the linked dataset from round 13 and round 14 of REACT-1.

|                    |        | Age Group                |          |                          |          |                          |          |                          |          |                          |
|--------------------|--------|--------------------------|----------|--------------------------|----------|--------------------------|----------|--------------------------|----------|--------------------------|
|                    |        | 18-34                    |          | 35-54                    |          | 55-64                    |          | 65+                      |          |                          |
|                    | N*     | Prevalence (%)           | Prop (%) | Prevalence (%)           | Prop (%) | Prevalence (%)           | Prop (%) | Prevalence (%)           | Prop (%) | Prevalence (%)           |
| Unvaccinated       | 22,437 | 1.76%<br>(1.60% , 1.95%) | 56.40%   | 1.66%<br>(1.17% , 2.35%) | 27.30%   | 1.33%<br>(0.79% , 2.23%) | 8.53%    | 0.93%<br>(0.27% , 3.10%) | 7.77%    | 0.25%<br>(0.03% , 1.76%) |
| 1 dose             | 14,386 | 0.77%<br>(0.64% , 0.93%) | 36.61%   | 0.84%<br>(0.59% , 1.20%) | 58.97%   | 0.64%<br>(0.48% , 0.85%) | 2.68%    | 0.84%<br>(0.26% , 2.71%) | 1.74%    | 0.30%<br>(0.04% , 2.13%) |
| 2 doses < 3 months | 62,920 | 0.35%<br>(0.31% , 0.40%) | 10.97%   | 0.42%<br>(0.28% , 0.65%) | 34.21%   | 0.50%<br>(0.41% , 0.61%) | 23.82%   | 0.29%<br>(0.21% , 0.39%) | 31.00%   | 0.20%<br>(0.15% , 0.28%) |
| 2 doses 3-6 months | 68,676 | 0.55%<br>(0.50% , 0.61%) | 4.38%    | 0.60%<br>(0.35% , 1.02%) | 25.37%   | 0.90%<br>(0.77% , 1.06%) | 27.47%   | 0.56%<br>(0.46% , 0.68%) | 42.78%   | 0.33%<br>(0.27% , 0.40%) |
| 2 doses > 6 months | 4,429  | 0.52%<br>(0.33% , 0.78%) | 7.28%    | 0.79%<br>(0.25% , 2.48%) | 26.98%   | 0.49%<br>(0.21% , 1.11%) | 20.38%   | 0.52%<br>(0.19% , 1.37%) | 45.37%   | 0.47%<br>(0.25% , 0.89%) |

\* A total of N=14 participants had missing dates in the linked data set.

**Supplementary Table 5.** Proportion of each Delta sub-lineage detected in 475 (62.1%) positive samples from round 14.

| Sub-lineage                             | N   | Proportion (95% confidence Interval) |
|-----------------------------------------|-----|--------------------------------------|
| B.1.617.2 (Delta/Sub-lineage not known) | 129 | 0.272 (0.234, 0.313)                 |
| AY.26                                   | 13  | 0.027 (0.016, 0.046)                 |
| AY.3                                    | 1   | 0.002 (0.000, 0.012)                 |
| AY.4                                    | 292 | 0.615 (0.570, 0.657)                 |
| AY.4.1                                  | 7   | 0.015 (0.007, 0.030)                 |
| AY.5                                    | 19  | 0.040 (0.026, 0.062)                 |
| AY.6                                    | 8   | 0.017 (0.009, 0.033)                 |
| AY.9                                    | 2   | 0.004 (0.001, 0.015)                 |
| AY.33                                   | 1   | 0.002 (0.000, 0.012)                 |
| AY.36                                   | 1   | 0.002 (0.000, 0.012)                 |
| AY.11                                   | 1   | 0.002 (0.000, 0.012)                 |
| AY.20                                   | 1   | 0.002 (0.000, 0.012)                 |

\* One Delta variant detected with the E484K mutation

\*\* 22 Delta variants detected with the Y145H mutation (8 in B.1.617.2, 14 in AY.4 sub-lineages)

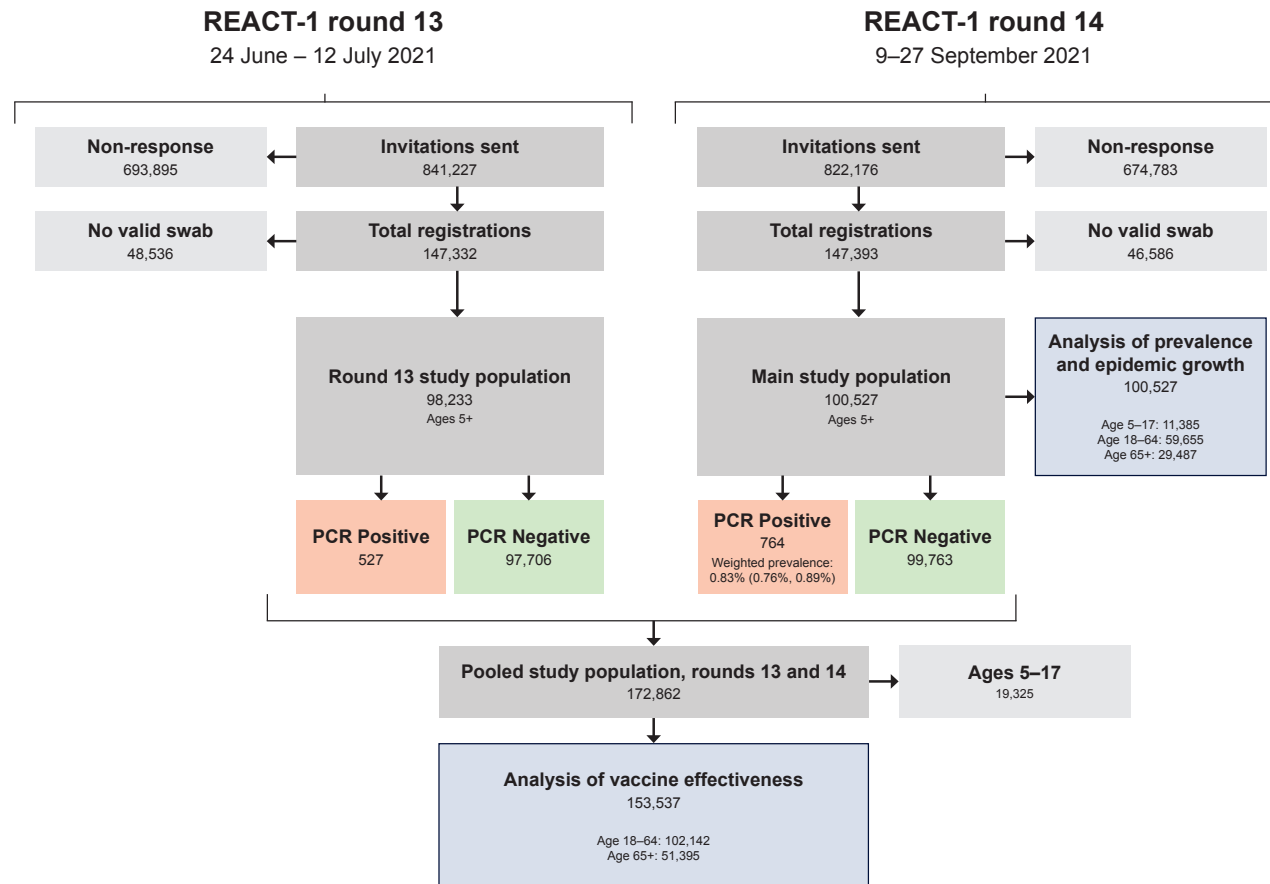

**Supplementary Figure 1.** Overview of REACT-1 study rounds 13 and 14 and of our analytical plan.



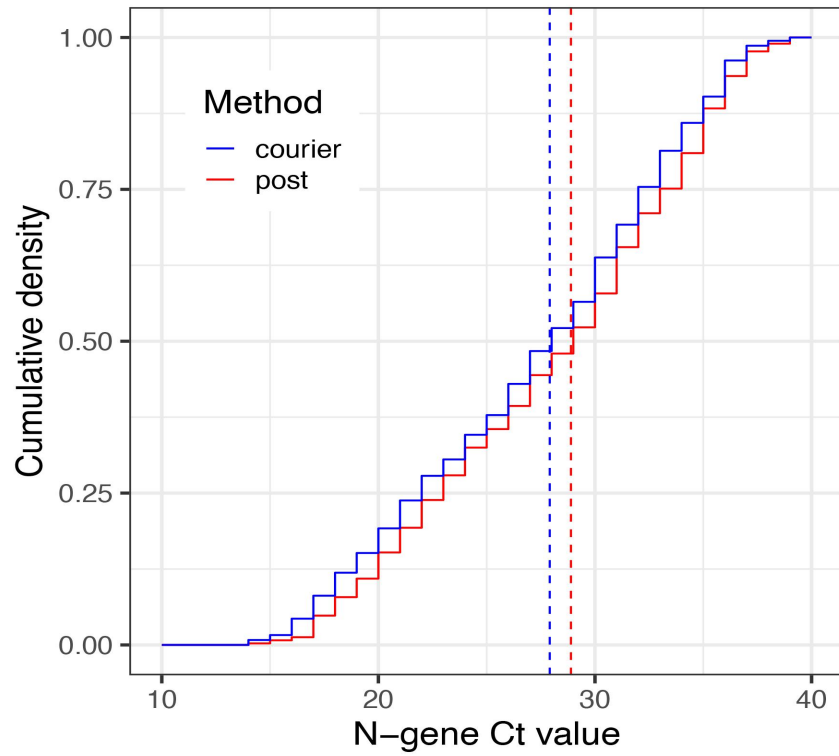

**Supplementary Figure 2.** Distribution of N-gene Ct values, by method used in collecting swab tests from participants, for all positive samples. Cumulative distribution of all N-gene Ct values for those whose swab test was collected by courier (blue) and those who sent their swab test in the post (red).

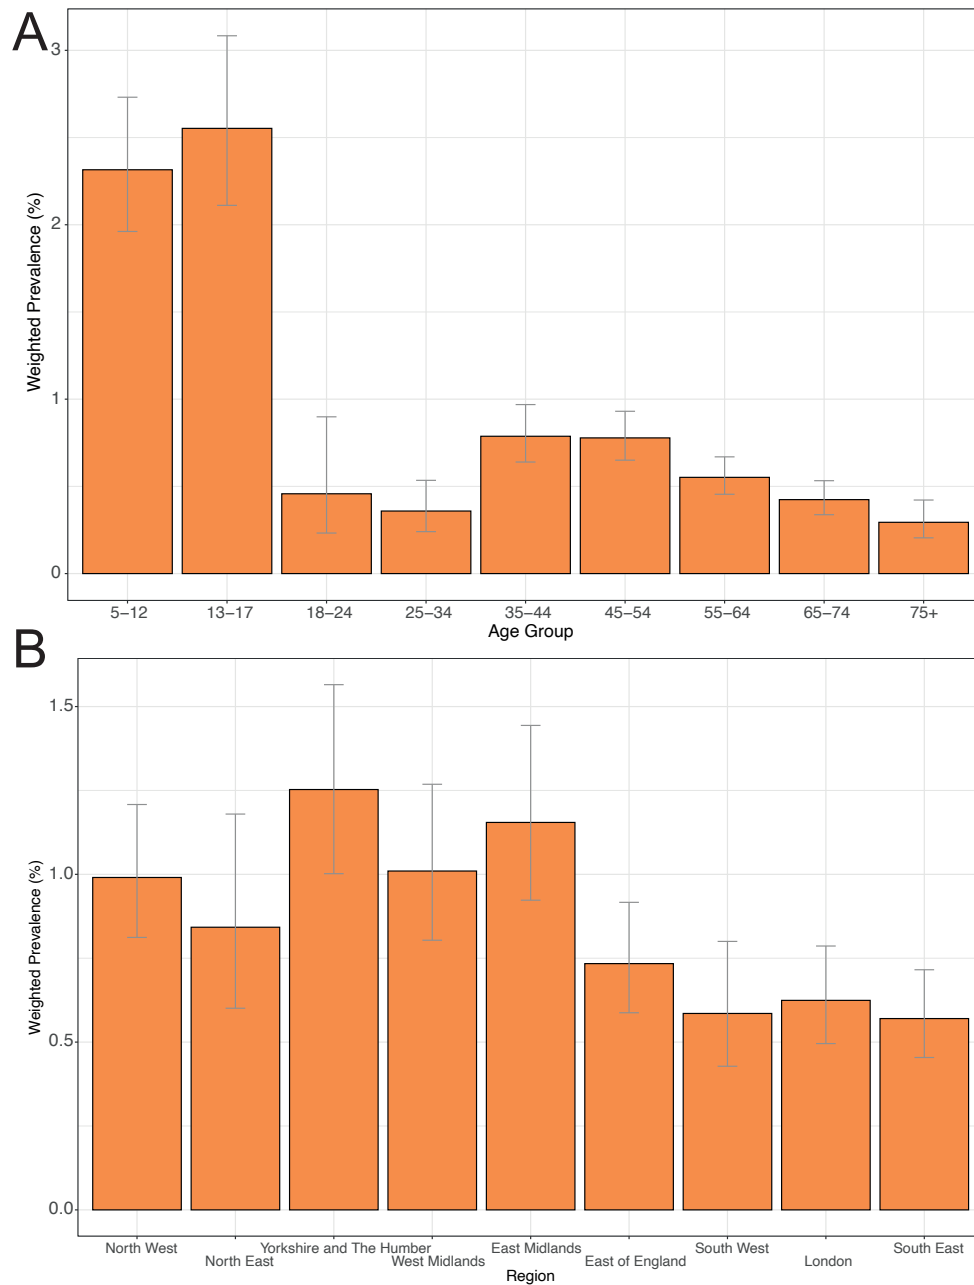

**Supplementary Figure 3.** Weighted prevalence of swab-positivity in round 14 by (A) age group and (B) region. Bars show the prevalence point estimates, and the vertical lines represent the 95% credible intervals.

# The COVID-19 Genomics UK (COG-UK) consortium

June 2021 V.1

**Funding acquisition, Leadership and supervision, Metadata curation, Project administration, Samples and logistics, Sequencing and analysis, Software and analysis tools, and Visualisation:**

Dr Samuel C Robson PhD <sup>13, 84</sup>

**Funding acquisition, Leadership and supervision, Metadata curation, Project administration, Samples and logistics, Sequencing and analysis, and Software and analysis tools:**

Dr Thomas R Connor PhD <sup>11, 74</sup> and Prof Nicholas J Loman PhD <sup>43</sup>

**Leadership and supervision, Metadata curation, Project administration, Samples and logistics, Sequencing and analysis, Software and analysis tools, and Visualisation:**

Dr Tanya Golubchik PhD <sup>5</sup>

**Funding acquisition, Leadership and supervision, Metadata curation, Samples and logistics, Sequencing and analysis, and Visualisation:**

Dr Rocio T Martinez Nunez PhD <sup>46</sup>

**Funding acquisition, Leadership and supervision, Project administration, Samples and logistics, Sequencing and analysis, and Software and analysis tools:**

Dr David Bonsall PhD <sup>5</sup>

**Funding acquisition, Leadership and supervision, Project administration, Sequencing and analysis, Software and analysis tools, and Visualisation:**

Prof Andrew Rambaut DPhil <sup>104</sup>

**Funding acquisition, Metadata curation, Project administration, Samples and logistics, Sequencing and analysis, and Software and analysis tools:**

Dr Luke B Snell MSc, MBBS <sup>12</sup>

**Leadership and supervision, Metadata curation, Project administration, Samples and logistics, Software and analysis tools, and Visualisation:**

Rich Livett MSc <sup>116</sup>

**Funding acquisition, Leadership and supervision, Metadata curation, Project administration, and Samples and logistics:**

Dr Catherine Ludden PhD <sup>20, 70</sup>

**Funding acquisition, Leadership and supervision, Metadata curation, Samples and logistics, and Sequencing and analysis:**

Dr Sally Corden PhD <sup>74</sup> and Dr Eleni Nastouli FRCPATH <sup>96, 95, 30</sup>

**Funding acquisition, Leadership and supervision, Metadata curation, Sequencing and analysis, and Software and analysis tools:**

Dr Gaia Nebbia PhD, FRCPATH <sup>12</sup>

**Funding acquisition, Leadership and supervision, Project administration, Samples and logistics, and Sequencing and analysis:**

Ian Johnston BSc <sup>116</sup>

**Leadership and supervision, Metadata curation, Project administration, Samples and logistics, and Sequencing and analysis:**

Prof Katrina Lythgoe PhD <sup>5</sup>, Dr M. Estee Torok FRCP <sup>19,20</sup> and Prof Ian G Goodfellow PhD <sup>24</sup>

**Leadership and supervision, Metadata curation, Project administration, Samples and logistics, and Visualisation:**

Dr Jacqui A Prieto PhD <sup>97,82</sup> and Dr Kordo Saeed MD, FRCPath <sup>97,83</sup>

**Leadership and supervision, Metadata curation, Project administration, Sequencing and analysis, and Software and analysis tools:**

Dr David K Jackson PhD <sup>116</sup>

**Leadership and supervision, Metadata curation, Samples and logistics, Sequencing and analysis, and Visualisation:**

Dr Catherine Houlihan PhD <sup>96,94</sup>

**Leadership and supervision, Metadata curation, Sequencing and analysis, Software and analysis tools, and Visualisation:**

Dr Dan Frampton PhD <sup>94,95</sup>

**Metadata curation, Project administration, Samples and logistics, Sequencing and analysis, and Software and analysis tools:**

Dr William L Hamilton PhD <sup>19</sup> and Dr Adam A Witney PhD <sup>41</sup>

**Funding acquisition, Samples and logistics, Sequencing and analysis, and Visualisation:**

Dr Giselda Bucca PhD <sup>101</sup>

**Funding acquisition, Leadership and supervision, Metadata curation, and Project administration:**

Dr Cassie F Pope PhD <sup>40,41</sup>

**Funding acquisition, Leadership and supervision, Metadata curation, and Samples and logistics:**

Dr Catherine Moore PhD <sup>74</sup>

**Funding acquisition, Leadership and supervision, Metadata curation, and Sequencing and analysis:**

Prof Emma C Thomson PhD, FRCP <sup>53</sup>

**Funding acquisition, Leadership and supervision, Project administration, and Samples and logistics:**

Dr Ewan M Harrison PhD <sup>116,102</sup>

**Funding acquisition, Leadership and supervision, Sequencing and analysis, and Visualisation:**

Prof Colin P Smith PhD <sup>101</sup>

**Leadership and supervision, Metadata curation, Project administration, and Sequencing and analysis:**

Fiona Rogan BSc <sup>77</sup>

**Leadership and supervision, Metadata curation, Project administration, and Samples and logistics:**

Shaun M Beckwith MSc <sup>6</sup>, Abigail Murray Degree <sup>6</sup>, Dawn Singleton HNC <sup>6</sup>, Dr Kirstine Eastick PhD, FRCPath <sup>37</sup>, Dr Liz A Sheridan PhD <sup>98</sup>, Paul Randell MSc, PgD <sup>99</sup>, Dr Leigh M Jackson PhD <sup>105</sup>, Dr Cristina V Ariani PhD <sup>116</sup> and Dr Sónia Gonçalves PhD <sup>116</sup>

**Leadership and supervision, Metadata curation, Samples and logistics, and Sequencing and analysis:**

Dr Derek J Fairley PhD <sup>3, 77</sup>, Prof Matthew W Loose PhD <sup>18</sup> and Joanne Watkins MSc <sup>74</sup>

**Leadership and supervision, Metadata curation, Samples and logistics, and Visualisation:**

Dr Samuel Moses MD <sup>25, 106</sup>

**Leadership and supervision, Metadata curation, Sequencing and analysis, and Software and analysis tools:**

Dr Sam Nicholls PhD <sup>43</sup>, Dr Matthew Bull PhD <sup>74</sup> and Dr Roberto Amato PhD <sup>116</sup>

**Leadership and supervision, Project administration, Samples and logistics, and Sequencing and analysis:**

Prof Darren L Smith PhD <sup>36, 65, 66</sup>

**Leadership and supervision, Sequencing and analysis, Software and analysis tools, and Visualisation:**

Prof David M Aanensen PhD <sup>14, 116</sup> and Dr Jeffrey C Barrett PhD <sup>116</sup>

**Metadata curation, Project administration, Samples and logistics, and Sequencing and analysis:**

Dr Dinesh Aggarwal MRCP<sup>20, 116, 70</sup>, Dr James G Shepherd MBCHB, MRCP <sup>53</sup>, Dr Martin D Curran PhD <sup>71</sup> and Dr Surendra Parmar PhD <sup>71</sup>

**Metadata curation, Project administration, Sequencing and analysis, and Software and analysis tools:**

Dr Matthew D Parker PhD <sup>109</sup>

**Metadata curation, Samples and logistics, Sequencing and analysis, and Software and analysis tools:**

Dr Catryn Williams PhD <sup>74</sup>

**Metadata curation, Samples and logistics, Sequencing and analysis, and Visualisation:**

Dr Sharon Glaysher PhD <sup>68</sup>

**Metadata curation, Sequencing and analysis, Software and analysis tools, and Visualisation:**

Dr Anthony P Underwood PhD <sup>14, 116</sup>, Dr Matthew Bashton PhD <sup>36, 65</sup>, Dr Nicole Pacchiarini PhD <sup>74</sup>, Dr Katie F Loveson PhD <sup>84</sup> and Matthew Byott MSc <sup>95, 96</sup>

**Project administration, Sequencing and analysis, Software and analysis tools, and Visualisation:**

Dr Alessandro M Carabelli PhD <sup>20</sup>

**Funding acquisition, Leadership and supervision, and Metadata curation:**

Dr Kate E Templeton PhD <sup>56, 104</sup>

**Funding acquisition, Leadership and supervision, and Project administration:**

Dr Thushan I de Silva PhD <sup>109</sup>, Dr Dennis Wang PhD <sup>109</sup>, Dr Cordelia F Langford PhD <sup>116</sup> and John Sillitoe BEng <sup>116</sup>

**Funding acquisition, Leadership and supervision, and Samples and logistics:**

Prof Rory N Gunson PhD, FRCPath <sup>55</sup>

**Funding acquisition, Leadership and supervision, and Sequencing and analysis:**

Dr Simon Cottrell PhD <sup>74</sup>, Dr Justin O'Grady PhD <sup>75, 103</sup> and Prof Dominic Kwiatkowski PhD <sup>116, 108</sup>

**Leadership and supervision, Metadata curation, and Project administration:**

Dr Patrick J Lillie PhD, FRCP <sup>37</sup>

**Leadership and supervision, Metadata curation, and Samples and logistics:**

Dr Nicholas Cortes MBCHB <sup>33</sup>, Dr Nathan Moore MBCHB <sup>33</sup>, Dr Claire Thomas DPhil <sup>33</sup>, Phillipa J Burns MSc, DipRCPath <sup>37</sup>, Dr Tabitha W Mahungu FRCPATH <sup>80</sup> and Steven Liggett BSc <sup>86</sup>

**Leadership and supervision, Metadata curation, and Sequencing and analysis:**

Angela H Beckett MSc <sup>13, 81</sup> and Prof Matthew TG Holden PhD <sup>73</sup>

**Leadership and supervision, Project administration, and Samples and logistics:**

Dr Lisa J Levett PhD <sup>34</sup>, Dr Husam Osman PhD <sup>70, 35</sup> and Dr Mohammed O Hassan-Ibrahim PhD, FRCPATH <sup>99</sup>

**Leadership and supervision, Project administration, and Sequencing and analysis:**

Dr David A Simpson PhD <sup>77</sup>

**Leadership and supervision, Samples and logistics, and Sequencing and analysis:**

Dr Meera Chand PhD <sup>72</sup>, Prof Ravi K Gupta PhD <sup>102</sup>, Prof Alistair C Darby PhD <sup>107</sup> and Prof Steve Paterson PhD <sup>107</sup>

**Leadership and supervision, Sequencing and analysis, and Software and analysis tools:**

Prof Oliver G Pybus DPhil <sup>23</sup>, Dr Erik M Volz PhD <sup>39</sup>, Prof Daniela de Angelis PhD <sup>52</sup>, Prof David L Robertson PhD <sup>53</sup>, Dr Andrew J Page PhD <sup>75</sup> and Dr Inigo Martincorena PhD <sup>116</sup>

**Leadership and supervision, Sequencing and analysis, and Visualisation:**

Dr Louise Aigrain PhD <sup>116</sup> and Dr Andrew R Bassett PhD <sup>116</sup>

**Metadata curation, Project administration, and Samples and logistics:**

Dr Nick Wong DPhil, MRCP, FRCPATH <sup>50</sup>, Dr Yusri Taha MD, PhD <sup>89</sup>, Michelle J Erkiert BA <sup>99</sup> and Dr Michael H Spencer Chapman MBBS <sup>116, 102</sup>

**Metadata curation, Project administration, and Sequencing and analysis:**

Dr Rebecca Dewar PhD <sup>56</sup> and Martin P McHugh MSc <sup>56, 111</sup>

**Metadata curation, Project administration, and Software and analysis tools:**

Siddharth Mookerjee MPH <sup>38, 57</sup>

**Metadata curation, Project administration, and Visualisation:**

Stephen Aplin <sup>97</sup>, Matthew Harvey <sup>97</sup>, Thea Sass <sup>97</sup>, Dr Helen Umpleby FRCP <sup>97</sup> and Helen Wheeler <sup>97</sup>

**Metadata curation, Samples and logistics, and Sequencing and analysis:**

Dr James P McKenna PhD <sup>3</sup>, Dr Ben Warne MRCP <sup>9</sup>, Joshua F Taylor MSc <sup>22</sup>, Yasmin Chaudhry BSc <sup>24</sup>, Rhys Izuagbe <sup>24</sup>, Dr Aminu S Jahun PhD <sup>24</sup>, Dr Gregory R Young PhD <sup>36, 65</sup>, Dr Claire McMurray PhD <sup>43</sup>, Dr Clare M McCann PhD <sup>65, 66</sup>, Dr Andrew Nelson PhD <sup>65, 66</sup> and Scott Elliott <sup>68</sup>

**Metadata curation, Samples and logistics, and Visualisation:**

Hannah Lowe MSc<sup>25</sup>

**Metadata curation, Sequencing and analysis, and Software and analysis tools:**

Dr Anna Price PhD<sup>11</sup>, Matthew R Crown BSc<sup>65</sup>, Dr Sara Rey PhD<sup>74</sup>, Dr Sunando Roy PhD<sup>96</sup> and Dr Ben Temperton PhD<sup>105</sup>

**Metadata curation, Sequencing and analysis, and Visualisation:**

Dr Sharif Shaaban PhD<sup>73</sup> and Dr Andrew R Hesketh PhD<sup>101</sup>

**Project administration, Samples and logistics, and Sequencing and analysis:**

Dr Kenneth G Laing PhD<sup>41</sup>, Dr Irene M Monahan PhD<sup>41</sup> and Dr Judith Heaney PhD<sup>95,96,34</sup>

**Project administration, Samples and logistics, and Visualisation:**

Dr Emanuela Pelosi FRCPATH<sup>97</sup>, Siona Silviera MSc<sup>97</sup> and Dr Eleri Wilson-Davies MD, FRCPATH<sup>97</sup>

**Samples and logistics, Software and analysis tools, and Visualisation:**

Dr Helen Fryer PhD<sup>5</sup>

**Sequencing and analysis, Software and analysis tools, and Visualization:**

Dr Helen Adams PhD<sup>4</sup>, Dr Louis du Plessis PhD<sup>23</sup>, Dr Rob Johnson PhD<sup>39</sup>, Dr William T Harvey PhD<sup>53,42</sup>, Dr Joseph Hughes PhD<sup>53</sup>, Dr Richard J Orton PhD<sup>53</sup>, Dr Lewis G Spurgin PhD<sup>59</sup>, Dr Yann Bourgeois PhD<sup>81</sup>, Dr Chris Ruis PhD<sup>102</sup>, Áine O'Toole MSc<sup>104</sup>, Marina Gourtovaia MSc<sup>116</sup> and Dr Theo Sanderson PhD<sup>116</sup>

**Funding acquisition, and Leadership and supervision:**

Dr Christophe Fraser PhD<sup>5</sup>, Dr Jonathan Edgeworth PhD, FRCPATH<sup>12</sup>, Prof Judith Breuer MD<sup>96,29</sup>, Dr Stephen L Mitchell PhD<sup>105</sup> and Prof John A Todd PhD<sup>115</sup>

**Funding acquisition, and Project administration:**

Michaela John BSc<sup>10</sup> and Dr David Buck PhD<sup>115</sup>

**Leadership and supervision, and Metadata curation:**

Dr Kavitha Gajee MBBS, FRCPATH<sup>37</sup> and Dr Gemma L Kay PhD<sup>75</sup>

**Leadership and supervision, and Project administration:**

Prof Sharon J Peacock PhD<sup>20,70</sup> and David Heyburn<sup>74</sup>

**Leadership and supervision, and Samples and logistics:**

Katie Kitchman BSc<sup>37</sup>, Prof Alan McNally PhD<sup>43,93</sup>, David T Pritchard MSc, CSci<sup>50</sup>, Dr Samir Dervisevic FRCPATH<sup>58</sup>, Dr Peter Muir PhD<sup>70</sup>, Dr Esther Robinson PhD<sup>70,35</sup>, Dr Barry B Vipond PhD<sup>70</sup>, Newara A Ramadan MSc, CSci, FIBMS<sup>78</sup>, Dr Christopher Jeanes MBBS<sup>90</sup>, Danni Weldon BSc<sup>116</sup>, Jana Catalan MSc<sup>118</sup> and Neil Jones MSc<sup>118</sup>

**Leadership and supervision, and Sequencing and analysis:**

Dr Ana da Silva Filipe PhD<sup>53</sup>, Dr Chris Williams MBBS<sup>74</sup>, Marc Fuchs BSc<sup>77</sup>, Dr Julia Miskelly PhD<sup>77</sup>, Dr Aaron R Jeffries PhD<sup>105</sup>, Karen Oliver BSc<sup>116</sup> and Dr Naomi R Park PhD<sup>116</sup>

**Metadata curation, and Samples and logistics:**

Amy Ash BSc<sup>1</sup>, Cherian Koshy MSc, CSci, FIBMS<sup>1</sup>, Magdalena Barrow<sup>7</sup>, Dr Sarah L Buchan PhD<sup>7</sup>, Dr Anna Mantzouratou PhD<sup>7</sup>, Dr Gemma Clark PhD<sup>15</sup>, Dr Christopher W Holmes PhD<sup>16</sup>, Sharon

Campbell MSc<sup>17</sup>, Thomas Davis MSc<sup>21</sup>, Ngee Keong Tan MSc<sup>22</sup>, Dr Julianne R Brown PhD<sup>29</sup>, Dr Kathryn A Harris PhD<sup>29,2</sup>, Stephen P Kidd MSc<sup>33</sup>, Dr Paul R Grant PhD<sup>34</sup>, Dr Li Xu-McCrae PhD<sup>35</sup>, Dr Alison Cox PhD<sup>38,63</sup>, PINGLAWATHEE MADONA<sup>38,63</sup>, Dr Marcus Pond PhD<sup>38,63</sup>, Dr Paul A Randell MBBCh<sup>38,63</sup>, Karen T Withell FIBMS<sup>48</sup>, Cheryl Williams MSc<sup>51</sup>, Dr Clive Graham MD<sup>60</sup>, Rebecca Denton-Smith BSc<sup>62</sup>, Emma Swindells BSc<sup>62</sup>, Robyn Turnbull BSc<sup>62</sup>, Dr Tim J Sloan PhD<sup>67</sup>, Dr Andrew Bosworth PhD<sup>70,35</sup>, Stephanie Hutchings<sup>70</sup>, Hannah M Pymont MSc<sup>70</sup>, Dr Anna Casey PhD<sup>76</sup>, Dr Liz Ratcliffe PhD<sup>76</sup>, Dr Christopher R Jones PhD<sup>79,105</sup>, Dr Bridget A Knight PhD<sup>79,105</sup>, Dr Tanzina Haque PhD, FRCPath<sup>80</sup>, Dr Jennifer Hart MRCP<sup>80</sup>, Dr Dianne Irish-Tavares FRCPath<sup>80</sup>, Eric Witele MSc<sup>80</sup>, Craig Mower BA<sup>86</sup>, Louisa K Watson DipHE<sup>86</sup>, Jennifer Collins BSc<sup>89</sup>, Gary Eltringham BSc<sup>89</sup>, Dorian Crudgington<sup>98</sup>, Ben Macklin<sup>98</sup>, Prof Miren Iturriza-Gomara PhD<sup>107</sup>, Dr Anita O Lucaci PhD<sup>107</sup> and Dr Patrick C McClure PhD<sup>113</sup>

#### **Metadata curation, and Sequencing and analysis:**

Matthew Carlile BSc<sup>18</sup>, Dr Nadine Holmes PhD<sup>18</sup>, Dr Christopher Moore PhD<sup>18</sup>, Dr Nathaniel Storey PhD<sup>29</sup>, Dr Stefan Rooke PhD<sup>73</sup>, Dr Gonzalo Yebra PhD<sup>73</sup>, Dr Noel Craine DPhil<sup>74</sup>, Malorie Perry MSc<sup>74</sup>, Dr Nabil-Fareed Alikhan PhD<sup>75</sup>, Dr Stephen Bridgett PhD<sup>77</sup>, Kate F Cook MSc<sup>84</sup>, Christopher Fearn MSc<sup>84</sup>, Dr Salman Goudarzi PhD<sup>84</sup>, Prof Ronan A Lyons MD<sup>88</sup>, Dr Thomas Williams MD<sup>104</sup>, Dr Sam T Haldenby PhD<sup>107</sup>, Jillian Durham BSc<sup>116</sup> and Dr Steven Leonard PhD<sup>116</sup>

#### **Metadata curation, and Software and analysis tools:**

Robert M Davies MA (Cantab)<sup>116</sup>

#### **Project administration, and Samples and logistics:**

Dr Rahul Batra MD<sup>12</sup>, Beth Blane BSc<sup>20</sup>, Dr Moira J Spyer PhD<sup>30,95,96</sup>, Perminder Smith MSc<sup>32,112</sup>, Mehmet Yavus<sup>85,109</sup>, Dr Rachel J Williams PhD<sup>96</sup>, Dr Adhyana IK Mahanama MD<sup>97</sup>, Dr Buddhini Samaraweera MD<sup>97</sup>, Sophia T Girgis MSc<sup>102</sup>, Samantha E Hansford CSci<sup>109</sup>, Dr Angie Green PhD<sup>115</sup>, Dr Charlotte Beaver PhD<sup>116</sup>, Katherine L Bellis<sup>116,102</sup>, Matthew J Dorman<sup>116</sup>, Sally Kay<sup>116</sup>, Liam Prestwood<sup>116</sup> and Dr Shavanthi Rajatileka PhD<sup>116</sup>

#### **Project administration, and Sequencing and analysis:**

Dr Joshua Quick PhD<sup>43</sup>

#### **Project administration, and Software and analysis tools:**

Radoslaw Poplawski BSc<sup>43</sup>

#### **Samples and logistics, and Sequencing and analysis:**

Dr Nicola Reynolds PhD<sup>8</sup>, Andrew Mack MPhil<sup>11</sup>, Dr Arthur Morriss PhD<sup>11</sup>, Thomas Whalley BSc<sup>11</sup>, Bindi Patel BSc<sup>12</sup>, Dr Iliana Georgana PhD<sup>24</sup>, Dr Myra Hosmillo PhD<sup>24</sup>, Malte L Pinckert MPhil<sup>24</sup>, Dr Joanne Stockton PhD<sup>43</sup>, Dr John H Henderson PhD<sup>65</sup>, Amy Hollis HND<sup>65</sup>, Dr William Stanley PhD<sup>65</sup>, Dr Wen C Yew PhD<sup>65</sup>, Dr Richard Myers PhD<sup>72</sup>, Dr Alicia Thornton PhD<sup>72</sup>, Alexander Adams BSc<sup>74</sup>, Tara Annett BSc<sup>74</sup>, Dr Hibo Asad PhD<sup>74</sup>, Alec Birchley MSc<sup>74</sup>, Jason Coombes BSc<sup>74</sup>, Johnathan M Evans MSc<sup>74</sup>, Laia Fina<sup>74</sup>, Bree Gatica-Wilcox MPhil<sup>74</sup>, Lauren Gilbert<sup>74</sup>, Lee Graham BSc<sup>74</sup>, Jessica Hey BSc<sup>74</sup>, Ember Hilvers MPH<sup>74</sup>, Sophie Jones MSc<sup>74</sup>, Hannah Jones<sup>74</sup>, Sara Kumziene-Summerhayes MSc<sup>74</sup>, Dr Caoimhe McKerr PhD<sup>74</sup>, Jessica Powell BSc<sup>74</sup>, Georgia Pugh<sup>74</sup>, Sarah Taylor<sup>74</sup>, Alexander J Trotter MRes<sup>75</sup>, Charlotte A Williams BSc<sup>96</sup>, Leanne M Kermack MSc<sup>102</sup>, Benjamin H Foulkes MSc<sup>109</sup>, Marta Gallis MSc<sup>109</sup>, Hailey R Hornsby MSc<sup>109</sup>, Stavroula F Louka MSc<sup>109</sup>, Dr Manoj Pohare PhD<sup>109</sup>, Paige Wolverson MSc<sup>109</sup>, Peijun Zhang MSc<sup>109</sup>, George MacIntyre-Cockett BSc<sup>115</sup>, Amy Trebes MSc<sup>115</sup>, Dr Robin J Moll PhD<sup>116</sup>, Lynne Ferguson MSc<sup>117</sup>, Dr Emily J Goldstein PhD<sup>117</sup>, Dr Alasdair Maclean PhD<sup>117</sup> and Dr Rachael Tomb PhD<sup>117</sup>

#### **Samples and logistics, and Software and analysis tools:**



Dr Igor Starinskij MSc, MRCP <sup>53</sup>

**Sequencing and analysis, and Software and analysis tools:**

Laura Thomson BSc <sup>5</sup>, Joel Southgate MSc <sup>11,74</sup>, Dr Moritz UG Kraemer DPhil <sup>23</sup>, Dr Jayna Raghvani PhD <sup>23</sup>, Dr Alex E Zarebski PhD <sup>23</sup>, Olivia Boyd MSc <sup>39</sup>, Lily Geidelberg MSc <sup>39</sup>, Dr Chris J Illingworth PhD <sup>52</sup>, Dr Chris Jackson PhD <sup>52</sup>, Dr David Pascall PhD <sup>52</sup>, Dr Sreenu Vattipally PhD <sup>53</sup>, Timothy M Freeman MPhil <sup>109</sup>, Dr Sharon N Hsu PhD <sup>109</sup>, Dr Benjamin B Lindsey MRCP <sup>109</sup>, Dr Keith James PhD <sup>116</sup>, Kevin Lewis <sup>116</sup>, Gerry Tonkin-Hill <sup>116</sup> and Dr Jaime M Tovar-Corona PhD <sup>116</sup>

**Sequencing and analysis, and Visualisation:**

MacGregor Cox MSci <sup>20</sup>

**Software and analysis tools, and Visualisation:**

Dr Khalil Abudahab PhD <sup>14,116</sup>, Mirko Menegazzo <sup>14</sup>, Ben EW Taylor MEng <sup>14,116</sup>, Dr Corin A Yeats PhD <sup>14</sup>, Afrida Mukaddas BTech <sup>53</sup>, Derek W Wright MSc <sup>53</sup>, Dr Leonardo de Oliveira Martins PhD <sup>75</sup>, Dr Rachel Colquhoun DPhil <sup>104</sup>, Verity Hill <sup>104</sup>, Dr Ben Jackson PhD <sup>104</sup>, Dr JT McCrone PhD <sup>104</sup>, Dr Nathan Medd PhD <sup>104</sup>, Dr Emily Scher PhD <sup>104</sup> and Jon-Paul Keatley <sup>116</sup>

**Leadership and supervision:**

Dr Tanya Curran PhD <sup>3</sup>, Dr Sian Morgan FRCPath <sup>10</sup>, Prof Patrick Maxwell PhD <sup>20</sup>, Prof Ken Smith PhD <sup>20</sup>, Dr Sahar Eldirdiri MBBS, MSc, FRCPath <sup>21</sup>, Anita Kenyon MSc <sup>21</sup>, Prof Alison H Holmes MD <sup>38,57</sup>, Dr James R Price PhD <sup>38,57</sup>, Dr Tim Wyatt PhD <sup>69</sup>, Dr Alison E Mather PhD <sup>75</sup>, Dr Timofey Skvortsov PhD <sup>77</sup> and Prof John A Hartley PhD <sup>96</sup>

**Metadata curation:**

Prof Martyn Guest PhD <sup>11</sup>, Dr Christine Kitchen PhD <sup>11</sup>, Dr Ian Merrick PhD <sup>11</sup>, Robert Munn BSc <sup>11</sup>, Dr Beatrice Bertolusso Degree <sup>33</sup>, Dr Jessica Lynch MBChB <sup>33</sup>, Dr Gabrielle Vernet MBBS <sup>33</sup>, Stuart Kirk MSc <sup>34</sup>, Dr Elizabeth Wastnedge MD <sup>56</sup>, Dr Rachael Stanley PhD <sup>58</sup>, Giles Idle <sup>64</sup>, Dr Declan T Bradley PhD <sup>69,77</sup>, Dr Jennifer Poyner MD <sup>79</sup> and Matilde Mori BSc <sup>110</sup>

**Project administration:**

Owen Jones BSc <sup>11</sup>, Victoria Wright BSc <sup>18</sup>, Ellena Brooks MA <sup>20</sup>, Carol M Churcher BSc <sup>20</sup>, Mireille Fragakis HND <sup>20</sup>, Dr Katerina Galai PhD <sup>20,70</sup>, Dr Andrew Jermy PhD <sup>20</sup>, Sarah Judges BA <sup>20</sup>, Georgina M McManus BSc <sup>20</sup>, Kim S Smith <sup>20</sup>, Dr Elaine Westwick PhD <sup>20</sup>, Dr Stephen W Attwood PhD <sup>23</sup>, Dr Frances Bolt PhD <sup>38,57</sup>, Dr Alisha Davies PhD <sup>74</sup>, Elen De Lacy MPH <sup>74</sup>, Fatima Downing <sup>74</sup>, Sue Edwards <sup>74</sup>, Lizzie Meadows MA <sup>75</sup>, Sarah Jeremiah MSc <sup>97</sup>, Dr Nikki Smith PhD <sup>109</sup> and Luke Foulser <sup>116</sup>

**Samples and logistics:**

Dr Themoula Charalampous PhD <sup>12,46</sup>, Amita Patel BSc <sup>12</sup>, Dr Louise Berry PhD <sup>15</sup>, Dr Tim Boswell PhD <sup>15</sup>, Dr Vicki M Fleming PhD <sup>15</sup>, Dr Hannah C Howson-Wells PhD <sup>15</sup>, Dr Amelia Joseph PhD <sup>15</sup>, Manjinder Khakh <sup>15</sup>, Dr Michelle M Lister PhD <sup>15</sup>, Paul W Bird MSc, MRes <sup>16</sup>, Karlie Fallon <sup>16</sup>, Thomas Helmer <sup>16</sup>, Dr Claire L McMurray PhD <sup>16</sup>, Mina Odedra BSc <sup>16</sup>, Jessica Shaw BSc <sup>16</sup>, Dr Julian W Tang PhD <sup>16</sup>, Nicholas J Willford MSc <sup>16</sup>, Victoria Blakey BSc <sup>17</sup>, Dr Veena Raviprakash MD <sup>17</sup>, Nicola Sheriff BSc <sup>17</sup>, Lesley-Anne Williams BSc <sup>17</sup>, Theresa Feltwell MSc <sup>20</sup>, Dr Luke Bedford PhD <sup>26</sup>, Dr James S Cargill PhD <sup>27</sup>, Warwick Hughes MSc <sup>27</sup>, Dr Jonathan Moore MD <sup>28</sup>, Susanne Stonehouse BSc <sup>28</sup>, Laura Atkinson MSc <sup>29</sup>, Jack CD Lee MSc <sup>29</sup>, Dr Divya Shah PhD <sup>29</sup>, Adela Alcolea-Medina Clinical scientist <sup>32,112</sup>, Natasha Ohemeng-Kumi MSc <sup>32,112</sup>, John Ramble MSc <sup>32,112</sup>, Jasveen Sehmi MSc <sup>32,112</sup>, Dr Rebecca Williams BMBS <sup>33</sup>, Wendy Chatterton MSc <sup>34</sup>, Monika Pusok MSc <sup>34</sup>, William Everson MSc <sup>37</sup>, Anibolina Castigador IBMS HCPC <sup>44</sup>, Emily Macnaughton FRCPath <sup>44</sup>, Dr Kate El Bouzidi MRCP <sup>45</sup>, Dr Temi Lampejo FRCPath <sup>45</sup>, Dr Malur Sudhanva FRCPath <sup>45</sup>, Cassie Breen BSc <sup>47</sup>, Dr Graciela Sluga MD, MSc <sup>48</sup>, Dr Shazaad SY Ahmad MSc <sup>49,70</sup>, Dr Ryan P George PhD <sup>49</sup>, Dr Nicholas W Machin MSc <sup>49,70</sup>, Debbie

Binns BSc <sup>50</sup>, Victoria James BSc <sup>50</sup>, Dr Rachel Blacow MBChB <sup>55</sup>, Dr Lindsay Coupland PhD <sup>58</sup>, Dr Louise Smith PhD <sup>59</sup>, Dr Edward Barton MD <sup>60</sup>, Debra Padgett BSc <sup>60</sup>, Garren Scott BSc <sup>60</sup>, Dr Aidan Cross MBChB <sup>61</sup>, Dr Mariyam Mirfenderesky FRCPath <sup>61</sup>, Jane Greenaway MSc <sup>62</sup>, Kevin Cole <sup>64</sup>, Phillip Clarke <sup>67</sup>, Nichola Duckworth <sup>67</sup>, Sarah Walsh <sup>67</sup>, Kelly Bicknell <sup>68</sup>, Robert Impey MSc <sup>68</sup>, Dr Sarah Wyllie PhD <sup>68</sup>, Richard Hopes <sup>70</sup>, Dr Chloe Bishop PhD <sup>72</sup>, Dr Vicki Chalker PhD <sup>72</sup>, Dr Ian Harrison PhD <sup>72</sup>, Laura Gifford MSc <sup>74</sup>, Dr Zoltan Molnar PhD <sup>77</sup>, Dr Cressida Auckland FRCPath <sup>79</sup>, Dr Cariad Evans PhD <sup>85,109</sup>, Dr Kate Johnson PhD <sup>85,109</sup>, Dr David G Partridge FRCPath <sup>85,109</sup>, Dr Mohammad Raza PhD <sup>85,109</sup>, Paul Baker MD <sup>86</sup>, Prof Stephen Bonner PhD <sup>86</sup>, Sarah Essex <sup>86</sup>, Leanne J Murray <sup>86</sup>, Andrew I Lawton MSc <sup>87</sup>, Dr Shirelle Burton-Fanning MD <sup>89</sup>, Dr Brendan Al Payne MD <sup>89</sup>, Dr Sheila Waugh MD <sup>89</sup>, Andrea N Gomes MSc <sup>91</sup>, Maimuna Kimuli MSc <sup>91</sup>, Darren R Murray MSc <sup>91</sup>, Paula Ashfield MSc <sup>92</sup>, Dr Donald Dobie MBChB <sup>92</sup>, Dr Fiona Ashford PhD <sup>93</sup>, Dr Angus Best PhD <sup>93</sup>, Dr Liam Crawford PhD <sup>93</sup>, Dr Nicola Cumley PhD <sup>93</sup>, Dr Megan Mayhew PhD <sup>93</sup>, Dr Oliver Megram PhD <sup>93</sup>, Dr Jeremy Mirza PhD <sup>93</sup>, Dr Emma Moles-Garcia PhD <sup>93</sup>, Dr Benita Percival PhD <sup>93</sup>, Megan Driscoll BSc <sup>96</sup>, Leah Ensell BSc <sup>96</sup>, Dr Helen L Lowe PhD <sup>96</sup>, Laurentiu Maftai BSc <sup>96</sup>, Matteo Mondani MSc <sup>96</sup>, Nicola J Chaloner BSc <sup>99</sup>, Benjamin J Cogger BSc <sup>99</sup>, Lisa J Easton MSc <sup>99</sup>, Hannah Huckson BSc <sup>99</sup>, Jonathan Lewis MSc, PgD, FIBMS <sup>99</sup>, Sarah Lowdon BSc <sup>99</sup>, Cassandra S Malone MSc <sup>99</sup>, Florence Munemo BSc <sup>99</sup>, Manasa Mutingwende MSc <sup>99</sup>, Roberto Nicodemi BSc <sup>99</sup>, Olga Podplomyk FD <sup>99</sup>, Thomas Somassa BSc <sup>99</sup>, Dr Andrew Beggs PhD <sup>100</sup>, Dr Alex Richter PhD <sup>100</sup>, Claire Cormie <sup>102</sup>, Joana Dias MSc <sup>102</sup>, Sally Forrest BSc <sup>102</sup>, Dr Ellen E Higginson PhD <sup>102</sup>, Mailis Maes MPhil <sup>102</sup>, Jamie Young BSc <sup>102</sup>, Dr Rose K Davidson PhD <sup>103</sup>, Kathryn A Jackson MSc <sup>107</sup>, Dr Lance Turtle PhD, MRCP <sup>107</sup>, Dr Alexander J Keeley MRCP <sup>109</sup>, Prof Jonathan Ball PhD <sup>113</sup>, Timothy Byaruhanga MSc <sup>113</sup>, Dr Joseph G Chappell PhD <sup>113</sup>, Jayasree Dey MSc <sup>113</sup>, Jack D Hill MSc <sup>113</sup>, Emily J Park MSc <sup>113</sup>, Arezou Fanaie MSc <sup>114</sup>, Rachel A Hilson MSc <sup>114</sup>, Geraldine Yaze MSc <sup>114</sup> and Stephanie Lo <sup>116</sup>

#### Sequencing and analysis:

Safiah Afifi BSc <sup>10</sup>, Robert Beer BSc <sup>10</sup>, Joshua Maksimovic FD <sup>10</sup>, Kathryn McCluggage Masters <sup>10</sup>, Karla Spellman FD <sup>10</sup>, Catherine Bresner BSc <sup>11</sup>, William Fuller BSc <sup>11</sup>, Dr Angela Marchbank BSc <sup>11</sup>, Trudy Workman HNC <sup>11</sup>, Dr Ekaterina Shelest PhD <sup>13,81</sup>, Dr Johnny Debebe PhD <sup>18</sup>, Dr Fei Sang PhD <sup>18</sup>, Dr Marina Escalera Zamudio PhD <sup>23</sup>, Dr Sarah Francois PhD <sup>23</sup>, Bernardo Gutierrez MSc <sup>23</sup>, Dr Tetyana I Vasylyeva DPhil <sup>23</sup>, Dr Flavia Flaviani PhD <sup>31</sup>, Dr Manon Ragonnet-Cronin PhD <sup>39</sup>, Dr Katherine L Smollett PhD <sup>42</sup>, Alice Broos BSc <sup>53</sup>, Daniel Mair BSc <sup>53</sup>, Jenna Nichols BSc <sup>53</sup>, Dr Kyriaki Nomikou PhD <sup>53</sup>, Dr Lily Tong PhD <sup>53</sup>, Ioulia Tsatsani MSc <sup>53</sup>, Prof Sarah O'Brien PhD <sup>54</sup>, Prof Steven Rushton PhD <sup>54</sup>, Dr Roy Sanderson PhD <sup>54</sup>, Dr Jon Perkins MBChB <sup>55</sup>, Seb Cotton MSc <sup>56</sup>, Abbie Gallagher BSc <sup>56</sup>, Dr Elias Allara MD, PhD <sup>70,102</sup>, Clare Pearson MSc <sup>70,102</sup>, Dr David Bibby PhD <sup>72</sup>, Dr Gavin Dabrera PhD <sup>72</sup>, Dr Nicholas Ellaby PhD <sup>72</sup>, Dr Eileen Gallagher PhD <sup>72</sup>, Dr Jonathan Hubb PhD <sup>72</sup>, Dr Angie Lackenby PhD <sup>72</sup>, Dr David Lee PhD <sup>72</sup>, Nikos Manesis <sup>72</sup>, Dr Tamyo Mbisa PhD <sup>72</sup>, Dr Steven Platt PhD <sup>72</sup>, Katherine A Twohig <sup>72</sup>, Dr Mari Morgan PhD <sup>74</sup>, Alp Aydin MSci <sup>75</sup>, David J Baker BEng <sup>75</sup>, Dr Ebenezer Foster-Nyarko PhD <sup>75</sup>, Dr Sophie J Prosolek PhD <sup>75</sup>, Steven Rudder <sup>75</sup>, Chris Baxter BSc <sup>77</sup>, Sílvia F Carvalho MSc <sup>77</sup>, Dr Deborah Lavin PhD <sup>77</sup>, Dr Arun Mariappan PhD <sup>77</sup>, Dr Clara Radulescu PhD <sup>77</sup>, Dr Aditi Singh PhD <sup>77</sup>, Miao Tang MD <sup>77</sup>, Helen Morcrette BSc <sup>79</sup>, Nadua Bayzid BSc <sup>96</sup>, Marius Cotic MSc <sup>96</sup>, Dr Carlos E Balcazar PhD <sup>104</sup>, Dr Michael D Gallagher PhD <sup>104</sup>, Dr Daniel Maloney PhD <sup>104</sup>, Thomas D Stanton BSc <sup>104</sup>, Dr Kathleen A Williamson PhD <sup>104</sup>, Dr Robin Manley PhD <sup>105</sup>, Michelle L Michelsen BSc <sup>105</sup>, Dr Christine M Sambles PhD <sup>105</sup>, Dr David J Studholme PhD <sup>105</sup>, Joanna Warwick-Dugdale BSc <sup>105</sup>, Richard Eccles MSc <sup>107</sup>, Matthew Gemmell MSc <sup>107</sup>, Dr Richard Gregory PhD <sup>107</sup>, Dr Margaret Hughes PhD <sup>107</sup>, Charlotte Nelson MSc <sup>107</sup>, Dr Lucille Rainbow PhD <sup>107</sup>, Dr Edith E Vamos PhD <sup>107</sup>, Hermione J Webster BSc <sup>107</sup>, Dr Mark Whitehead PhD <sup>107</sup>, Claudia Wierzbicki BSc <sup>107</sup>, Dr Adrienn Angyal PhD <sup>109</sup>, Dr Luke R Green PhD <sup>109</sup>, Dr Max Whiteley PhD <sup>109</sup>, Emma Betteridge BSc <sup>116</sup>, Dr Iraad F Bronner PhD <sup>116</sup>, Ben W Farr BSc <sup>116</sup>, Scott Goodwin MSc <sup>116</sup>, Dr Stefanie V Lensing PhD <sup>116</sup>, Shane A McCarthy <sup>116,102</sup>, Dr Michael A Quail PhD <sup>116</sup>, Diana Rajan MSc <sup>116</sup>, Dr Nicholas M Redshaw PhD <sup>116</sup>, Carol Scott <sup>116</sup>, Lesley Shirley MSc <sup>116</sup> and Scott AJ Thurston BSc <sup>116</sup>

## Software and analysis tools:

Dr Will Rowe PhD<sup>43</sup>, Amy Gaskin MSc<sup>74</sup>, Dr Thanh Le-Viet PhD<sup>75</sup>, James Bonfield BSc<sup>116</sup>, Jennifer Liddle<sup>116</sup> and Andrew Whitwham BSc<sup>116</sup>

**1** Barking, Havering and Redbridge University Hospitals NHS Trust, **2** Barts Health NHS Trust, **3** Belfast Health & Social Care Trust, **4** Betsi Cadwaladr University Health Board, **5** Big Data Institute, Nuffield Department of Medicine, University of Oxford, **6** Blackpool Teaching Hospitals NHS Foundation Trust, **7** Bournemouth University, **8** Cambridge Stem Cell Institute, University of Cambridge, **9** Cambridge University Hospitals NHS Foundation Trust, **10** Cardiff and Vale University Health Board, **11** Cardiff University, **12** Centre for Clinical Infection and Diagnostics Research, Department of Infectious Diseases, Guy's and St Thomas' NHS Foundation Trust, **13** Centre for Enzyme Innovation, University of Portsmouth, **14** Centre for Genomic Pathogen Surveillance, University of Oxford, **15** Clinical Microbiology Department, Queens Medical Centre, Nottingham University Hospitals NHS Trust, **16** Clinical Microbiology, University Hospitals of Leicester NHS Trust, **17** County Durham and Darlington NHS Foundation Trust, **18** Deep Seq, School of Life Sciences, Queens Medical Centre, University of Nottingham, **19** Department of Infectious Diseases and Microbiology, Cambridge University Hospitals NHS Foundation Trust, **20** Department of Medicine, University of Cambridge, **21** Department of Microbiology, Kettering General Hospital, **22** Department of Microbiology, South West London Pathology, **23** Department of Zoology, University of Oxford, **24** Division of Virology, Department of Pathology, University of Cambridge, **25** East Kent Hospitals University NHS Foundation Trust, **26** East Suffolk and North Essex NHS Foundation Trust, **27** East Sussex Healthcare NHS Trust, **28** Gateshead Health NHS Foundation Trust, **29** Great Ormond Street Hospital for Children NHS Foundation Trust, **30** Great Ormond Street Institute of Child Health (GOS ICH), University College London (UCL), **31** Guy's and St. Thomas' Biomedical Research Centre, **32** Guy's and St. Thomas' NHS Foundation Trust, **33** Hampshire Hospitals NHS Foundation Trust, **34** Health Services Laboratories, **35** Heartlands Hospital, Birmingham, **36** Hub for Biotechnology in the Built Environment, Northumbria University, **37** Hull University Teaching Hospitals NHS Trust, **38** Imperial College Healthcare NHS Trust, **39** Imperial College London, **40** Infection Care Group, St George's University Hospitals NHS Foundation Trust, **41** Institute for Infection and Immunity, St George's University of London, **42** Institute of Biodiversity, Animal Health & Comparative Medicine, **43** Institute of Microbiology and Infection, University of Birmingham, **44** Isle of Wight NHS Trust, **45** King's College Hospital NHS Foundation Trust, **46** King's College London, **47** Liverpool Clinical Laboratories, **48** Maidstone and Tunbridge Wells NHS Trust, **49** Manchester University NHS Foundation Trust, **50** Microbiology Department, Buckinghamshire Healthcare NHS Trust, **51** Microbiology, Royal Oldham Hospital, **52** MRC Biostatistics Unit, University of Cambridge, **53** MRC-University of Glasgow Centre for Virus Research, **54** Newcastle University, **55** NHS Greater Glasgow and Clyde, **56** NHS Lothian, **57** NIHR Health Protection Research Unit in HCAI and AMR, Imperial College London, **58** Norfolk and Norwich University Hospitals NHS Foundation Trust, **59** Norfolk County Council, **60** North Cumbria Integrated Care NHS Foundation Trust, **61** North Middlesex University Hospital NHS Trust, **62** North Tees and Hartlepool NHS Foundation Trust, **63** North West London Pathology, **64** Northumbria Healthcare NHS Foundation Trust, **65** Northumbria University, **66** NU-OMICS, Northumbria University, **67** Path Links, Northern Lincolnshire and Goole NHS Foundation Trust, **68** Portsmouth Hospitals University NHS Trust, **69** Public Health Agency, Northern Ireland, **70** Public Health England, **71** Public Health England, Cambridge, **72** Public Health England, Colindale, **73** Public Health Scotland, **74** Public Health Wales, **75** Quadram Institute Bioscience, **76** Queen Elizabeth Hospital, Birmingham, **77** Queen's University Belfast, **78** Royal Brompton and Harefield Hospitals, **79** Royal Devon and Exeter NHS Foundation Trust, **80** Royal Free London NHS Foundation Trust, **81** School of Biological Sciences, University of Portsmouth, **82** School of Health Sciences, University of Southampton, **83** School of Medicine, University of Southampton, **84** School of Pharmacy & Biomedical Sciences, University of Portsmouth, **85** Sheffield Teaching Hospitals NHS Foundation Trust, **86** South Tees Hospitals NHS Foundation Trust, **87** Southwest Pathology Services, **88** Swansea University, **89** The Newcastle upon Tyne Hospitals NHS Foundation Trust, **90** The Queen Elizabeth Hospital King's Lynn NHS Foundation Trust, **91** The Royal Marsden NHS Foundation Trust, **92** The Royal Wolverhampton NHS Trust, **93** Turnkey Laboratory, University of Birmingham, **94** University College London Division of Infection and Immunity, **95** University College London Hospital Advanced Pathogen Diagnostics Unit, **96** University College London Hospitals NHS Foundation Trust, **97** University Hospital Southampton NHS Foundation Trust, **98** University Hospitals Dorset NHS Foundation Trust, **99** University Hospitals Sussex NHS Foundation Trust, **100** University of Birmingham, **101** University of Brighton, **102** University of Cambridge, **103** University of East Anglia, **104** University of Edinburgh, **105** University of Exeter, **106** University of Kent, **107** University of Liverpool, **108** University of Oxford, **109** University of Sheffield, **110** University of Southampton, **111** University of St Andrews, **112** Viapath, Guy's and St Thomas' NHS Foundation Trust, and King's College Hospital NHS Foundation Trust, **113** Virology, School of Life Sciences, Queens Medical

Centre, University of Nottingham, **114** Watford General Hospital, **115** Wellcome Centre for Human Genetics, Nuffield Department of Medicine, University of Oxford, **116** Wellcome Sanger Institute, **117** West of Scotland Specialist Virology Centre, NHS Greater Glasgow and Clyde, **118** Whittington Health NHS Trust
